1

2 **Title: *Arabidopsis* ABIG1 Functions in Laminar Growth and Polarity Formation through**  
3 **Regulation by *REVOLUTA* and *KANADI***

4

5 Jesus Preciado<sup>1</sup>, Kevin Begcy<sup>2</sup>, Tie Liu<sup>1\*</sup>

6

7 <sup>1</sup>University of Florida, Horticultural Science Department, Gainesville, Florida 32611. USA

8 <sup>2</sup>University of Florida, Environmental Horticulture Department, Gainesville, Florida 32611,  
9 USA.

10 \*Corresponding author

11 Phone: 352-846-2638

12 Email: [tieliu@ufl.edu](mailto:tieliu@ufl.edu)

13

14 ORCID IDs:

15 Kevin Begcy (0000-0002-5046-8029)

16 Tie Liu (0000-0003-0159-8270)

17

18

19 **Highlight**

20 ABIG1, a HD-ZIP Class II transcription factor, promotes laminar growth and adaxial-abaxial  
21 polarity through the regulation of *REV* and *KAN*.

22

23

24 **Abstract**

25 Leaf laminar growth and adaxial-abaxial boundary formation are fundamental outcomes of plant  
26 development. Boundary and laminar growth coordinate the further patterning and growth of the  
27 leaf, directing the differentiation of cell types within the top and bottom domains and promoting  
28 initiation of lateral organs along their adaxial/abaxial axis. Leaf adaxial-abaxial polarity  
29 specification and laminar out-growth are regulated by two transcription factors, *REVOLUTA*  
30 (*REV*) and *KANADI* (*KAN*). *ABA INSENSITIVE TO GROWTH 1* (*ABIG1*) is a  
31 *HOMEODOMAIN-LEUCINE ZIPPER* (*HD-ZIP*) Class II transcription factor and is a direct

32 target of the adaxial-abaxial regulators *REV* and *KAN*. To investigate the role of *ABIG1* in the  
33 leaf development and establishment of polarity, we examined the phenotypes of both gain-of-  
34 function and loss-of-function mutants. Through genetic interaction analysis with *REV* and *KAN*  
35 mutants, we have determined that *ABIG1* plays a role in leaf laminar-growth as well as in  
36 adaxial-abaxial polarity establishment. Genetic and physical interaction assays showed that  
37 *ABIG1* interacts with the transcriptional corepressor *TOPELESS (TPL)*. This study provides new  
38 evidence that another *HD-ZIP II* gene, *ABIG1*, facilitates growth through the corepressor *TPL*.

39

#### 40 **Keywords**

41 Genetic interaction, *ABIG1*, *HDZIP II*, *TPL*, *REV*, *KAN*

42

#### 43 **Introduction**

44 Plant architecture is one of the basic tenets of plant biology. The initiation of the spatial  
45 arrangement of root, shoot, and floral meristems is an elaborate, intricate and well-coordinated  
46 process. The ‘body plan’ of shoot architecture begins with the establishment of a primary axis of  
47 growth (Leyser, 2009). Abaxial and adaxial characteristics can be defined in the shoot apical  
48 meristem (SAM), the leaves, and the vasculature (Byrne, 2006). In the SAM, the central zone is  
49 the adaxial region and contains pluripotent cells, while the abaxial region is farthest from the  
50 center of the meristem (Husbands et al., 2009). Leaf primordia emerge in between the adaxial  
51 and abaxial regions and develop a clearly defined adaxial side, or upper surface, and an abaxial  
52 side, or lower surface. Rapid expansion of the adaxial and abaxial domains result in the boundary  
53 formation of leaves, cell type specification, and laminar development. The abaxial-abaxial  
54 boundary is the marginal region that separated between the adaxial and abaxial epidermis.  
55 Mature leaves can be further subdivided into regions comprising an epidermis with frequent  
56 trichomes and densely-packed lay of palisade mesophyll cells (adaxial), and an epidermis with  
57 abundant stomata and loosely-packed spongy mesophyll (abaxial) regions. In the vasculature, the  
58 xylem is adaxial to the phloem (Waits & Hudson, 1995). The differentiation of distinctive cell  
59 types within adaxial and adaxial domain during leaf development leads to function of gas  
60 exchange and regulation of photosynthesis. Adaxialized or abaxialized alterations result in mild  
61 to severe defects in leaf formation, trichome distribution, stomatal density and the vasculature  
62 organization (McConnell et al., 1998; Eshed et al., 2001; Emery et al., 2003). *HOMEODOMAIN-*

63 *LEUCINE ZIPPER (HD-ZIP)* transcription factors, *KANADI* genes and *microRNA (MIR165/166)*  
64 are involved in a variety of processes during early development. Within the four classes (I-IV) of  
65 *HD-ZIPs*, *HD-ZIP III*s have been shown to have a function in SAM formation, promote adaxial  
66 fate, and develop vasculature patterning (Emery et al., 2003; Prigge et al., 2005). In *Arabidopsis*,  
67 there are five *HD-ZIP III* transcription factors, *REVOLUTA (REV)*, *PHABULOSA(PHB)*,  
68 *PHAVOLUTA (PHV)*, *CORONA/ATHB15*, and *ATHB8*. Four of the five *HD-ZIP III*s have been  
69 shown to regulate adaxial fate in leaf development and are functionally redundant (Prigge et al.,  
70 2005). A dominant mutant *phb1-d* altered leaf polarity that developed into a needle-shaped leaf  
71 and failed to form a leaf blade (McConnell et al., 1998). On the other hand, *KANADI (KAN)*  
72 genes promote abaxial fate of leaves (Kerstetter et al., 2001). Loss-of-function of *kan1kan2*  
73 double mutants results in adaxialized leaf phenotypes with expanded expressions of *HDZIPIII*  
74 (Eshed et al., 2001). Gain-of-function mutants of both genes cause an abaxialized phenotype in  
75 the leaf blade and vascular tissue with repressed expressions of *HDZIPIII* (Eshed et al., 2001).  
76 *HD-ZIP II*s have roles in light response, shade avoidance, auxin signaling, and leaf polarity  
77 (Ruberti et al., 1991; Ciabelli et al., 2008; Elhiti & Stasolla, 2009; Sessa et al., 2005a, 2018b;  
78 Turchi et al., 2013; Merelo et al 2016) . Class II proteins are composed of a homeodomain, an  
79 adjacent leucine zipper motif, and a DNA-binding domain (Ruberti et al., 1991). HD-ZIPII  
80 proteins contain an LxLxL and CPSCERV motif (Ciabelli et al., 2008; Hermsen et al., 2010).  
81 Notably, the LxLxL motif, known as the EAR (Ethylene-responsive binding factor-associated  
82 repression) (Ruberti et al., 1991; Ciabelli et al., 2008), has been shown to be important in  
83 transcriptional repression in *Arabidopsis* (Kagale and Rozwadowski, 2011). The CPSCERV  
84 motif may play a role in sensing environmental cues (Ciabelli et al., 2008). Recently, several  
85 HD-ZIP II genes, such as HAT2, HAT3 and ATHb4, were identified that play essential roles in  
86 adaxial-abaxial formation (Bou-Torrent, et al., 2012; Turchi et al., 2013; Sessa 2018). The  
87 double mutant *hat3 athb4* produced abaxialized and entirely radialized leaves, whereas gain-of-  
88 function lines developed up-curved leaves (Bou-Torrent, et al., 2012). Additionally, HAT3 and  
89 ATHB4 form a bidirectional repressive circuit to control the balance between adaxial and abaxial  
90 fate determination (Merelo et al, 2016). Moreover, some *HD-ZIP II*s, including HAT1 and  
91 ABIG1(also known as HAT22), physically interacted with TPL/TPR in a yeast hybrid assay  
92 (Causier et al., 2012). The Groucho/Tup1 corepressor *TPL* and *TPR* families have been  
93 implicated in the regulation of diverse developmental processes, including leaf development,

94 hormone signaling, and stress responses (Tao, et al., 2013; Szemenyei et al., 2008; Pauwels et al.,  
95 2010). A downstream target analysis of *TOPLESS RELATED 3 (TPR3)* under drought conditions  
96 showed a significant induction by *ABIG1* (Liu et al., 2016).

97  
98 *KAN* and *REV* have opposite roles in promoting adaxial-abaxial polarity formation (Reinhardt et  
99 al., 2013). This antagonistic regulation between *REV* and *KAN* mainly through opposing  
100 regulation of downstream targets (Reinhardt et al., 2013). Downstream targets of these  
101 transcription factors include class II *HDZIP (HD-ZIP II)* transcription factors. Among *HD-ZIP II*s,  
102 *HAT2* and *ABIG1* were shown to be genes oppositely regulated by *REV* and *KAN* (Reinhardt et  
103 al., 2013). Those two genes belong to the Opposite Regulated by *REV* and *KAN* (*ORKs*) genes  
104 and are direct targets of *REV* and *KAN1* (Reinhardt et al., 2013; Liu et al., 2016). The *ABA*  
105 *INSENSITIVE GROWTH 1 (At4g37790, ABIG1)* has been shown to mediate abscisic acid (*ABA*)  
106 growth inhibition, but not stomatal closure. The function of *ABIG1* has been investigated in  
107 response to drought stress, but not during plant development (Liu et al., 2016). Here, we  
108 describe a novel function of *ABIG1* in laminar growth and adaxial-abaxial polarity. The *abig1*  
109 mutant phenotype exhibits defects in plant growth, leaf formation and patterning. We also  
110 provide evidence of the genetic and physical interaction of *ABIG1* with *TOPLESS (TPL)*, which  
111 together regulate leaf development.

112

## 113 **Materials and Methods**

### 114 **Plant materials and growth conditions**

115 *Arabidopsis* seeds were directly sown in potting medium (ProMix PGX soil mix) or on solid  
116 media containing MS Basal Salts (PhytoTech, KS), 0.05% MES, and 0.05% sucrose at, pH 5.7.  
117 Seedlings germinated on media were transferred 7-10 days after planting (DAP). Plants were  
118 grown in a chamber under 12 h light, 25 °C Day/30 °C night, and ≤50% RH.

119

### 120 **Cloning of constructs and plant transformation**

121 The complete coding sequence of *ABIG1*, *HAT9*, and *HAT14* was amplified using gene-specific  
122 primers (S2 Table). Promoter regions of *ABIG1* were amplified using primers targeting 3-kb  
123 upstream sequence. PCR products were cloned into GATEWAY *pENTR/D-TOPO* (Invitrogen,  
124 CA) vectors. Entry clones were subcloned into *pMDC32* overexpression (Curtis et al., 2003),

125 *pMDC163 GUS*, and *C/N-YFP* (Bai et al., 2007) destination vectors via LR reaction. Positive  
126 clones were verified using PCR and sequencing. *Agrobacterium* (strain: GV3101) transformation  
127 was performed by adding 250-500 ng plasmid DNA to 50  $\mu$ L of thawed electrocompetent cells.  
128 The cell suspension was frozen in liquid nitrogen for 5 mins and heat-shock treated at 37  $^{\circ}$ C for  
129 30 s, returned to ice for 5 mins and shaken at 250 RPM for 3 hours at 28  $^{\circ}$ C. Bacterial cultures  
130 (100-500  $\mu$ l) were spread onto kanamycin-selective plates and incubated for 2-3 days at 28  $^{\circ}$ C.  
131 Positive colonies were screened using PCR for the corresponding insert size. The constructs  
132 *pMDC32:ABIG1* (*35S:ABIG1*), *pMDC32:HAT9* (*35S:HAT9*), *pMDC32:HAT14* (*35S:HAT14*),  
133 and *pMDC163:ABIG1* (*pABIG1:GUS*) were introduced into *Arabidopsis* (Col-0) by  
134 *Agrobacterium*-mediated transformation as described in (Clough et al., 1998).

135

### 136 **Genotyping and double mutant analysis**

137 For genotyping, genetic crossing and phenotype analysis, the following ecotypes and mutants of  
138 *Arabidopsis* (*Arabidopiss thaliana*) were used: Landsberg erecta, Ler, *abig1-1* (ecotype, Ler; Liu  
139 et al., 2016), *rev-6* (Ler; Prigge, et al., 2005), *rev-10d* (Ler; (Emery, et all., 2003), *kan1,2,3* (Ler;  
140 Eshed et al., 2004), and *tpl-1* (Ler; Long et al., 2002). The genotyping methods and primer  
141 sequences for the single and double mutants are listed in S2 Table.

142

### 143 **GUS staining and histology**

144 More than twenty T<sub>3</sub> transgenic lines were examined for GUS activity. The seedlings, rosette  
145 leaves, and inflorescence tissues were harvested and pre-fixed in 80% acetone on ice for 1 hour,  
146 followed by submerging into GUS staining solution (100 mM potassium phosphate buffer, pH  
147 7.0, 0.5 mM potassium ferricyanide and potassium ferrocyanide, 10% Tween buffer, and 1 mM  
148 X-gluc) at 37  $^{\circ}$ C for 2 hours or overnight. The chlorophyll was removed by washing stained  
149 tissues with 70% ethanol three times. For the vascular tissue observation, all tissues were  
150 examined, and photographs were taken using a Nikon stereoscopic dissecting or compound  
151 microscope (SMZ1000).

152

### 153 **Leaf sectioning and observation**

154 Ten seedlings and ten rosette leaves were dissected and fixed in 2% (v/v) glutaraldehyde for 2  
155 hours and rinsed in water. All tissues were rinsed, dehydrated through an ethanol series, and

156 embedded in LR white resin (EMS, #14380). Samples were polymerized anaerobically to cure  
157 the white resin into transparent capsules. Embedded tissues were trimmed and cut into 2- $\mu$ m thin  
158 sections. The sections were collected and stained with eosin for five min and washed twice,  
159 followed by staining with toluidine blue for 30 min before mounting on slides. Slides were  
160 examined and photographed using a Nikon compound microscope.

161

### 162 **Scanning electron microscopy (SEM)**

163 Fresh plant tissues were fixed and mounted to the stage of a FEI Inspec-S Scanning Electron  
164 Microscope (FEI) and viewed with low pressure and medium scanning speed.

165

### 166 **Quantitative measurement of leaf size and shape**

167 For measurement of the leaf size, shape, and number of cells, the seventh leaf of each WT and  
168 mutant plant was cleared in 70% ethanol, flattened, and mounted on slides with cyto seal. The  
169 petiole length, blade length, blade width, leaf perimeter, and area were calculated using the  
170 macro plugin in Fiji/ImageJ. To measure the cell numbers, three pictures were taken from the tip,  
171 middle region near vein, and bottom of the adaxial side of each leaf using a Leica compound  
172 microscope and a 10X objective with the same light and contrast settings. The total number of  
173 cells was counted in the whole area of every picture. Ten to twelve plants were used for each  
174 data point (Maloof et al., 2013).

175

### 176 **Real-Time PCR experiments**

177 Arabidopsis seeds were germinated in liquid medium and grow for 12 days and then treated with  
178 dexamethasone for 120 minute or pre-treated with cycloheximide for 20 minutes. Total RNA was  
179 isolated from mock, dexamethasone-treated, cycloheximide-treated and cycloheximide-  
180 dexamethasone treated Col-0, GR-REV and GR-KAN by using Nucleospin RNA Plant kit  
181 (Macherey-Nagel, [www.mn-net.com](http://www.mn-net.com)). cDNA was made from 1 ug total RNA using Tetro cDNA  
182 synthesis kit with DNase treatment according to manufacturer`s instructions (Bioline). cDNA  
183 was diluted into 100 ul and 2 ul of cDNA was used to perform qRT-PCR. PCR was done using  
184 gene-specific primers (see Supplemental Table 1) in technical triplicates on a LightCycler 480  
185 system using the Sensifast SYBR Master mix (Bioline). The ratio of experimental target mRNA

186 to an ACTIN control for each sample was calculated by Applied Biosystems software. An  
187 average for the biological replicates and standard deviation were calculated in Excel.

188

### 189 **Yeast two-hybrid assay**

190 The full length *ABIG1*, *REV* (negative control), *TPL*, and truncated versions of *ABIG1* were  
191 amplified from cDNA and sequenced before cloning into GATEWAY® pENTR/D-TOPO®  
192 (Invitrogen, CA). The entry clones were subcloned into both pDEST32 and pDEST22 vectors  
193 (Invitrogen). The fragments were predicted to produce proteins of various length, designated as  
194 ABIG1N (protein sequence, 1-52 amino acids), ABIG1NHD (1-202 aa), ABIG1HD (53-202 aa),  
195 ABIG1HDC (53-278 aa), ABIG1C (203-278 aa), and ABIG1 (1-278 aa). To generate the  
196 mutated EAR domain in the ABIG1 construct, ABIG1NA (1-52 aa), the LXLXL sequence was  
197 replaced with AXAXA by PCR. Yeast two-hybrid interaction assays and color reactions were  
198 performed as described in the ProQuest Two-Hybrid System (Invitrogen #PQ10001-01,  
199 Carlsbad).

200

### 201 **Biomolecular fluorescence complementation**

202 The coding regions of *ABIG1*, *REV* and *TPL* were cloned from *Arabidopsis* cDNA as described  
203 above. The entry clones were subcloned into pSPYNE-35S and pSPYCE-35S vectors to generate  
204 BiFC constructs for transient expression assays (Walter et al., 2004). The transient tobacco assay  
205 methods were modified from (Walter et al., 2004). The tobacco leaves were harvested two days  
206 after infiltration and immediately examined using an SP5 confocal microscope (Leica) using the  
207 same settings for all samples (gain, contrast and pinhole) to examine the subcellular level of  
208 living tobacco cells. This result was consistent in three individual tobacco plants. This  
209 experiment was repeated twice.

210

## 211 **Results**

### 212 **ABIG1 is expressed within the adaxial side of leaves**

213 We have previously demonstrated that *ABIG1* is one of the *ORK* genes (for Oppositely  
214 Regulated by *REV* and *KAN*) with a role in ABA-induced senescence (Reinhardt et al., 2013; Liu  
215 et al., 2016). Additionally, we also showed that *ABIG1*, *HAT1*, and *HAT2* were regulated by

216 *REV* and *KAN* in dexamethasone (DEX) plus protein synthesis inhibitor cycloheximide (CHX)-  
217 treated plants and acted as a direct target for both factors (Liu et al., 2016). Although it was  
218 determined that *ABIG1* was up-regulated by *GR-REV* (Glucocorticoid Receptor, GR) and down-  
219 regulated by *GR-KANI*, little is known about the role of *ABIG1* during the establishment of  
220 tissue adaxial-abaxial polarity. Initially, we performed Real-Time PCR expression analysis to  
221 confirm all the HDZIP II family members in regulation of *REV* and *KAN* and found that the  
222 majority of them are regulated by *REV* and *KAN* (Fig. 1A, and Fig S1). Thus, to elucidate the  
223 polarity function of *ABIG1*, we investigated its expression in all plant tissues throughout plant  
224 development (Fig. 1B-G). We generated a promoter construct that includes the *ABIG1* coding  
225 region and 3-kb upstream, fused to the reporter  $\beta$ -glucuronidase (GUS) gene, and transformed it  
226 into *Arabidopsis Col-0*. At the seedling stage (7 days), GUS staining showed strong *ABIG1*  
227 expression in the vascular tissues of cotyledons, leaf primordia, roots and inflorescences (Fig.  
228 1B-E). To further determine whether *ABIG1* expression was also associated with leaf polarity  
229 development, London Resin (LR)-white sections were made of seven-day-old GUS reporter  
230 seedlings and leaf primordia from 10 individual T2 lines. Longitudinal and cross sections of the  
231 shoot apex revealed that GUS expression was strongest in the leaf primordia, lateral stipules, and  
232 the adaxial side of epidermal cells in young and mature leaves (Fig. 1B, C, F). In the rosette  
233 leaves, the expression was found in both adaxial and abaxial epidermal and mesophyll cells but  
234 stronger in adaxial epidermis (Fig. 1G). These observations showed that *ABIG1* was active in  
235 the adaxial sides of leaf in the seedling stage and expanded to mesophyll and abaxial side of  
236 leaves in the mature stage, suggesting a role for *ABIG1* in leaf development and adaxial-abaxial  
237 polarity patterning during leaf expansion. During reproductive development, we observed that  
238 *ABIG1* expression was also present in young floral buds, petals, and filaments (Fig. 1E),  
239 suggesting a potential role during reproduction. This result is in agreement with a previous  
240 finding that *ABIG1* was involved in floral organ polarity development (Shchennikova et al.,  
241 2018).

242

### 243 **Ectopic expression of *ABIG1* created adaxial-abaxial polarity defects**

244 In order to gain further insights into the function of *ABIG1*, we generated *ABIG1*-  
245 overexpression lines using the CaMV 35S promoter (*35S:ABIG1*) in the Col-0 background. The  
246 overexpression of *ABIG1* resulted in severe growth defects in both the T1 and T2 generations



247 (Fig. 2). Compared to WT, 12-day old of *35S:ABIG1* seedlings were smaller with extremely  
248 narrower leaf blades and up-curved leaves (Fig. 2B). Scanning electron microscopy (SEM)  
249 images showed that the narrow leaf blade and up-curling phenotypes of *35S:ABIG1* occurred  
250 early during the emergence of the true leaves (Fig. 2D). Later in plant development, when new  
251 leaves were fully expanded, the leaves of the overexpression lines remained curled upward  
252 towards the adaxial leaf surface, in contrast to the flattening of wild-type leaves (Fig. 2E-F).  
253 When transplanted to soil, *35S:ABIG1* plants remained dwarfed and displayed small narrow leaf  
254 blades and up-curved leaves (Fig. 2G, M, O). In addition, there was no internode elongation, and  
255 a very short stem developed in the *35S:ABIG1* plants. Upon flowering, *35S:ABIG1* plants  
256 typically produced abnormal inflorescence with few flowers that were sterile (Fig. 2G). In  
257 addition to the phenotypic observation, we performed quantitative measurement of the leaf size  
258 and shape to determine the differences between WT and the *35S:ABIG1* line (Fig. 2H-K). In the  
259 *35S:ABIG1* plants, there was a significant decrease in petiole length, blade length and width (Fig.  
260 2H) as well as in blade perimeter and area (Fig. 2I-J). Furthermore, examination of the cell size  
261 in true leaves from 12-day-old plants (12 plants, the seventh leaf per plant) revealed that  
262 *35S:ABIG1* had a greater number of cells in the tip, middle, and bottom regions of the leaves  
263 (Fig. 2K). This analysis revealed that overexpression of *ABIG1* resulted in phenotypes that affect  
264 polarity along with reduced lamina development, thereby decreasing leaf size. This is consistent  
265 with previous observations showing that establishment of adaxial and abaxial patterns is required  
266 for leaf blade formation (Bowman et al., 2002; Lin et al., 2003).

267  
268 Examination of cleared, fully expanded rosette leaves revealed that the venation pattern was  
269 not interrupted (Fig. 2M). To further examine the phenotypic defects in the vasculature of  
270 *35S:ABIG1* plants, mature leaves were collected, sectioned, and stained with toluidine blue. In  
271 the vascular bundle, transverse sections through the midvein of *35S:ABIG1* leaves displayed an  
272 altered vascular pattern (Fig. 2N-Q). In contrast to the distinct adaxial-abaxial polarity patterning  
273 of the vasculature in WT plants (Fig. 2N, P), the organization of the phloem and xylem cells  
274 were disrupted in the *35S:ABIG1* plants (Fig. 2O, Q). The phloem tissues were surrounded by  
275 xylem cells, a phenotype similar to those of the *kan1kan2kan3* triple mutant or a dominant gain-  
276 of-function *rev-10d* mutant (Emory, et al., 2003).

277 To further investigate the *ABIG1* involvement in polarity formation and leaf development, we  
278 overexpressed two other closely related HDZIPIIs, *HAT9* and *HAT14*. We were not able to detect  
279 any obvious growth defect in *35S:HAT9*, however, we observed a phenotype on the leaf  
280 development of the *35S:HAT14* mutant (Fig. 2S, U). The phenotype in gain-of-function of  
281 *HAT14* was similar to but less severe than that of *ABIG1*. Sixteen out of 20 transgenic lines  
282 showed up-curved leaves in seedling stage (Fig. 2S). Consistent with up-curved leaf phenotype in  
283 *35S:ABIG1*, those plants developed unusual phenotype with up-curved leaf blade in rosette leaves  
284 (Fig. 2U). These results showed a clear relationship between *ABIG1* and *HAT14* in leaf polarity  
285 development.

286

### 287 **Polarity-mediated leaf development requires *ABIG1* functions**

288 The mutant line *abig1-1*, an enhancer trap line in the *Landsberg erecta* background and a knock  
289 down allele of *abig1* mutant, has been reported to be insensitive to ABA treatment and tolerant  
290 to drought stress (Liu et al., 2016). The enhancer trap system uses Ac/Ds transposable elements  
291 and a GUS reporter gene to identify the expression pattern and regulatory cascade of the trapped  
292 gene (Springer, 2000). To characterize the roles of *ABIG1* in adaxial-abaxial pattern formation,  
293 the *abig1-1* mutant was examined during leaf development (Fig. 3). At the seedling stage, the  
294 true leaves of homozygous *abig1-1* plants displayed a subtly downward curled phenotype (20/20,  
295 Fig. 3) compared to WT (0/20, Fig. 3A). The observed phenotype was consistent with the  
296 previously described *revoluta* phenotype (Reinhart et al., 2013). Since mRNA levels of *ABIG1*  
297 are up-regulated by *REV* and down-regulated *KAN*, we decided to obtain higher order mutants.  
298 *REV* is a positive regulator of *ABIG1* expression and has been shown to induce a number of *HD-*  
299 *ZIP II* genes including *HAT3* (Reinhart et al., 2013). The *rev-6* mutant displays a slightly  
300 downward curled leaf phenotype (22/24, Fig. 3C). In the homozygous *rev-6 abig1-1* double  
301 mutant, the leaf down-curling phenotype of the rosette leaves was more severe than the *rev-6* and  
302 *abig1-1* single mutants (15/20, Fig. 3D). In contrast to the relatively weak *rev-6* allele, we found  
303 around 25% of the double mutant significantly affected shoot development (Fig. 4B-F). The  
304 phyllotaxy of the floral branches in *rev-6 abig1-1* mutant was irregular, and the length of the  
305 internode was often reduced (Fig. 4B). Additionally, the double mutant exhibited a stronger  
306 phenotype in reproductive growth and development, as the *rev-6 abig1-1* produced a radialized,

307 bladeless cauline leaf, suggesting the loss of adaxial identity in emerging leaf primordia (Fig. 4E-  
308 F). In *rev-6 abig1-1*, a single flower formed at the flower primordia and developed into a single  
309 silique (24/30, Fig. 4C) indicating that the floral primordia were arrested at an early  
310 developmental stage. Additionally, several entirely radialized axillary buds (Fig. 4E-F) were  
311 observed in *abig1-1 rev-6*. The phenotype was consistently observed to the next generation with  
312 high frequency (12/12). We did not observe this phenotype with radialized axillary buds in the  
313 *rev-6* mutant (22/22). These data indicated that loss of *ABIG1* function enhanced the downward  
314 curled phenotype of the *rev* mutant that resulted in extremely abaxialized phenotype.

315 We hypothesized that *REV* and *ABIG1* function together in establishing adaxial patterning. To  
316 address this possibility, we generated a double mutant between *abig1-1* and a gain-of-function  
317 *REV* mutant, *rev-10d* (Emery et al., 2003). In *rev-10d* mutants, upward curled (15/15, 15 plants  
318 out of 15 plants) and fused leaves (9/15, 9 plants out of 15 plants) are often observed (Fig. 3E-F).  
319 The *rev-10d abig1-1* double mutant caused reduced phenotype in contrast to *rev-10d* single  
320 mutant (Fig. 3G-H). The seedlings of *abig1-1 rev-10d* produced rosette leaves that are flat and  
321 less curled upward (12/12) (Fig. 3H), the frequency of fused leaves was also significantly  
322 reduced (0/12, Fig. 3G-H). Overall, these observations indicated that loss-of-function of *abig1-1*  
323 mutant reduced *rev-10d* phenotype indicating *ABIG1* primarily contributes to adaxial identity.

324 *KAN* is a negative regulator of *ABIG1* expression (Reinhart et al., 2013). To more clearly define  
325 the function of *ABIG1* in adaxial polarity establishment, we crossed *abig1-1* mutants to the  
326 polarity defective triple *kan1kan2/+kan3* knockout mutant, in which the adaxial-abaxial polarity  
327 in most leaves is severely disrupted that forms long petiole and upward curled leaves (Fig. 3I).  
328 The quadruple mutant (*abig1/kan1/kan2/kan3*) did not exhibit additional defects in leaf polarity  
329 in the seedling stages, displaying long petioles and narrow leaf blades (Fig. 3J). Once  
330 transplanted to soil, the *kan1kan2kan3* triple mutant remained dwarf but also developed a severe  
331 phenotype with lobed leaves and a leaflet-like structure growing out of the leaf blade (12/12, Fig.  
332 4G-H). In contrast to the triple mutant, the *abig1-1kan1kan2kan3* quadruple mutant had few  
333 leaflet-like structures on the leaf blade and a partial reduction of the extreme adaxialized  
334 phenotype in the *kan1kan2kan3* triple mutant (15/18, Fig. 4I-J). This phenotypic difference was  
335 more obvious at maturity where the *abig1-1kan1kan2kan3* quadruple mutant displayed upcurled  
336 leaves without leaflet-like tissue on leaf blade (18/18, Fig. 4K). This suggested that loss of

337 *ABIG1* function caused by the *abig1-1* mutation partially rescue the severe adaxialization  
338 phenotype exhibited by the *kan1kan2kan3* triple mutant.

339

#### 340 **Genetic interaction between *ABIG1* and *TOPLESS***

341 To further analyze how *ABIG1* is involved in leaf development and regulates leaf polarity  
342 patterning, we examined the genetics and biochemical interaction between *ABIG1* and its  
343 downstream target. We previously performed RNA-sequencing of an estradiol-induced *ABIG1*  
344 line (*XVE:ABIG1*) and identified a small number of downstream targets (Liu et al., 2016). The  
345 majority of targets are involved in stress-responsive pathways such as ABA and JA signaling  
346 pathways (Liu et al., 2016). The data indicated that *TOPLESS RELATED 3 (TPR3)* was  
347 significantly induced by *ABIG1* (Liu et al., 2016). Since the role of TPL/TPR corepressors were  
348 involved in various developmental processes. We focused on investigating genetic and  
349 biochemical interaction between *ABIG1* and TPL/TPR. As the TPL/TPR loss-of-function  
350 mutants show no obvious phenotype due to functional redundancy, we explored the genetic  
351 interaction between *abig1-1* and *tpl-1*, a dominant-negative mutant that is involved in embryonic  
352 development (Smith & Long, 2010) by generating double mutants of *abig1-1* and *tpl-1*. *tpl-1*, a  
353 temperature-sensitive mutant (Long et al., 2002). When grown at 22 °C, *tpl-1* mutants displayed  
354 pin-shaped, fused, and cup-shaped cotyledons (Fig. 5C-E). The *abig1-1 tpl-1* phenotype  
355 appeared to be enhanced compared to *tpl-1*, in that 3% of the double homozygous seedlings  
356 (6/188) failed to form a shoot and grew two roots when germinated at 22 °C (Table S1; Fig. 5F-  
357 G). The shoot-to-root transformation phenotype was only observed in the *tpl-1* single mutant  
358 when embryos developed at 29 °C (Long et al., 2002). The number of single cotyledons in the  
359 *abig1-1 tpl-1* mutant (34%, 63/188) was higher than in the *tpl-1* single mutant (20%, 38/192)  
360 (Table S1). Later in development, seedlings that began with single and fused cotyledons  
361 continued developing cup-shaped true leaves (Fig. 5I), a phenotype never observed in the *tpl-1*  
362 mutant (Fig. 5H). At flowering, double mutants formed dwarf plants, smaller than *abig1-1* and  
363 *tpl-1* single mutants (Fig. 5L). These results suggested that the *abig1-1 tpl-1* double mutant  
364 enhanced the *tpl* mutant phenotype. Furthermore, *ABIG1* expression in *abig1-1 tpl-1* seedlings  
365 was distinguishable from *abig1-1* in that GUS staining was found in the vasculature of double-  
366 root seedlings, cup-shaped cotyledon seedlings, fused-cotyledons, and at the topmost region of

367 pin shaped seedlings in the double mutant (Fig. 5G, J-K). These genetic results indicated that  
368 *ABIG1* is necessary for leaf formation in *tpl-1* mutant plants.

369

### 370 **ABIG1 physically interacts with TPL corepressors**

371 *TPL* has been shown to act as a corepressor (Causier et al., 2012). Corepressor recruitment is  
372 largely governed by the presence of an EAR (Ethylene-responsive binding factor-associated  
373 repression) motif. To test the hypothesis that ABIG1 and TPL physically interacted through the  
374 EAR domain, we initially generated a variety of truncated ABIG1 variants to characterize the  
375 key regions of ABIG1 required for interaction with TPL (Fig. 6A) to test protein-protein  
376 interactions using a yeast two-hybrid assay (Fig. 6A). The GAL4 binding domain (BD) was  
377 fused to TPL as bait, and the GAL4 activation domain (AD) was fused to ABIG1 as prey. An  
378 interaction between the two proteins occurred in yeast (Fig. 6B). Yeast two-hybrid analysis of a  
379 full-length, unaltered REVOLUTA\*-MEK (Magnani & Barton., 2011), Fig. 6A, construct 8), an  
380 HD-ZIP III protein lacking an EAR motif, showed no  $\beta$ -gal activity. Next, the ABIG1 domains  
381 were analyzed for their necessity for interaction with TPL using seven truncated ABIG1  
382 configurations (Fig. 6B, constructs 1-7), including a mutated EAR motif (LXLXL to AXAXA,  
383 2). Constructs 1, 3 and 7 contained the minimal N-terminus region required for transcriptional  
384 activation of  $\beta$ -gal, and each harbored the EAR motif. Construct 2, carrying a mutated EAR  
385 motif, did not interact with ABIG1. This indicated that the EAR domain of ABIG1 could  
386 strongly interact with TPL.

387 To confirm whether ABIG1 interacts with TPL *in vivo*, we carried out bimolecular  
388 fluorescence complementation (BiFC) analysis (Fig. 6B). ABIG1 was fused to the N-terminus of  
389 YFP, and TPL was fused to the C-terminal end. Consistent with yeast two-hybrid results (Fig.  
390 6A), there was an interaction between ABIG1 and TPL, and the signal was clearly evident in the  
391 nucleus (Fig. 6B). A negative control using REV\*-MEK C-terminus paired with N-terminus TPL  
392 lacked a fluorescent signal. Together, these two assays suggested that ABIG1 interacts with TPL  
393 both *in vitro* and *in vivo*.

394

### 395 **Discussion**

396

397 We previously demonstrated that *ABSCISIC ACID INSENSITIVE GROWTH 1 (ABIG1)* is  
398 oppositely regulated by *REV* and *KAN (ORK)* genes and that *ABIG1* can inhibit leaf growth and  
399 leaf production at the shoot apical meristem and can retard root growth and cause leaf yellowing  
400 under drought conditions (Liu et al., 2016). The aim of this paper was to investigate the role of  
401 *ABIG1* in establishing lateral organ polarity in *Arabidopsis*. Our study presents evidence to  
402 support the hypothesis that *ABIG1* is necessary for laminar growth and leaf polarity  
403 establishment in *Arabidopsis*. Firstly, plants carrying a mutation in *ABIG1* show defects in leaf  
404 polarity formation that caused a down-curved phenotype in rosette leaves. When *ABIG1* was  
405 overexpressed, plants exhibited upwardly curled leaves, defects in leaf size and shape, and  
406 altered vascular patterning. Secondly, *pABIG1:GUS* expression was restricted to the adaxial side  
407 of leaf primordia and the expanded mature leaf. Thirdly, the genetic interaction within a double  
408 *ABIG1* and *REV* mutant showed a severely abaxialized phenotype with downwardly curled  
409 leaves and an enhanced radial-shape to cauline leaves. Other double mutants, namely *abig1-*  
410 *Irev-10D* and *abig1-1kan1,2,3*, rescued the leaf curling and polarity phenotype. These results  
411 suggested that *ABIG1* functions in laminar growth and similarly to *REV* as an adaxial regulator  
412 and plays a role in adaxial polarity formation. Therefore, we suspected that *ABIG1* may be  
413 involved in other regulatory networks that control leaf laminar growth and adaxial-abaxial fate  
414 decision. Among the potential targets of *ABIG1*, we investigated *TPL* using genetic and  
415 biochemical approaches to test any interactions. Similar genetic interactions between *TPL* and  
416 *REV* have been reported (Smith and Long., 2010). We found that *abig1 tpl-1* double mutants  
417 showed enhanced double-root phenotype. The majority of HD-ZIP II proteins, including *ABIG1*,  
418 have an EAR domain in their N-terminal region, indicating they have may act as transcriptional  
419 repressors. We examined the interaction of *ABIG1* with the corepressor *TPL* using Yeast Two-  
420 Hybrid and Bi-molecular Fluorescence Complementation (BiFC) assays. Our results showed that  
421 *ABIG1* and *TPL* directly interacted through the EAR domain in both yeast and tobacco  
422 epidermal cells. Our data show that *ABIG1* plays a role in leaf laminar development in  
423 *Arabidopsis*.

424

#### 425 ***HD-ZIP II* genes are required for adaxial-abaxial polarity establishment in *Arabidopsis***

426 Among the ten members of the *HD-ZIP II* gene family in *Arabidopsis*, *ATHB2*, *HAT3* and  
427 *ATHB4* function redundantly in establishing the dorsal-ventral axis in cotyledons and developing

428 leaves (Bou-Torrent, et al., 2012). . It is worth noting that *HAT3* and *ATHB4* are expressed in the  
429 abaxial domain of leaf and genetically interact with the HD-ZIP III genes *REV*, *PHB* and *PHV* to  
430 control both SAM development and bilateral symmetrical patterning during leaf formation  
431 (Tuchi et al., 2013). In addition, *JAIBA (JAB)/HAT1*, a close homolog of *HAT3* and *HAT2*,  
432 regulates meristematic activity during formation of different tissues and organs during both  
433 vegetative and reproductive stages (Zuniga-Mayo et al., 2012). In agreement with these findings,  
434 we found that the *HD-ZIP II ABIG1* is involved in adaxial fate determination, as has been found  
435 for other *HD-ZIP II* genes such as *HAT1*, *HAT3*, *ATHB2*, and *ATHB4* (Tuchi et al., 2013; Merelo  
436 et al., 2016). . Although *ABIG1* is not within the same subfamily as *HAT1*, *HAT3* and *ATHB4*, it  
437 is in a sister clade (Ciabelli et al., 2008). There are two additional *HD-ZIP II* genes within this  
438 subfamily, *HAT9* and *HAT14*, which are the closest relatives to *ABIG1* in *Arabidopsis* (Ciabelli  
439 et al., 2008). Given the ability of *HD-ZIP II* genes to negatively auto-regulate and the close  
440 homology, *HAT9* and *HAT14* may also contribute to *ABIG1* functions. A similar leaf curled  
441 upward phenotypic change was observed in *35S:HAT14*, suggesting that *HAT14* also involved in  
442 leaf polarity formation. Additionally, the observation that both *HD-ZIP II* and *III* genes are  
443 involved in abaxial-abaxial polarity development might indicate that HD-ZIPs function in the  
444 same pathways. Based on the genetic and biochemical interactions between HD-ZIP II and III  
445 genes and proteins, functional redundancy was observed during apical formation and leaf  
446 polarity establishment in embryos (Tuchi et al., 2013). However, it is still unclear whether *HD-*  
447 *ZIP II* genes act independently in organ polarity or if their activities depend upon the *HD-ZIP*  
448 *III*s.

449

#### 450 **ORK genes play dual roles in hormone-mediated development and stress responses**

451 *ABIG1* is regulated by *REV* and *KAN*. *REV* and *KAN* display opposite roles in establishing leaf  
452 adaxial-abaxial polarity (Reinhart et al., 2013; Liu et al., 2016). *REV* acts as an activator and  
453 *KAN* acts as a repressor in the transcriptional response to leaf boundary formation. They  
454 antagonize each other by regulating downstream targets in opposite directions, such as a couple  
455 of transcription factors that play regulatory roles in various hormone-mediated developmental  
456 and stress-responsive processes. Brandt et al., (2012) has previously shown that the expression of  
457 another *ORK* gene, *TAA1*, an auxin biosynthesis enzyme, is activated in the adaxial domain by  
458 *REV* while repressed in the abaxial side by *KAN*. Another pair of *ORK* genes, *PYL6* and *CIPK12*,

459 are related to ABA responses. *PYL6* is an ABA receptor (*RCAR/PYR1/PYL*) that binds to ABA  
460 and leads to inactivation of the *SNF1-Related Kinases* (*SnRKs*) that regulate the ABA signaling  
461 pathway (Qin et al., 2008). CIPK12 is a member of the SnRK3 family that is involved in ABA-  
462 dependent signaling and polarized pollen tube growth (Steinhorst et al., 2015). Little is known  
463 about how ABA signaling is involved in leaf polarity. However, *PYR1*, which is required for  
464 ABA transport, displays differential adaxial-abaxial expression patterns, which is directed by  
465 *mir165/166* and their target HD-ZIP III (Yang et al., 2019). Similarly, the *ABIG1* gene plays a  
466 role in mediating endogenous ABA signals and in response to drought treatment. We noted that  
467 *ABIG1* is also increased by drought in floral tissues (Su et al., 2013). This is particularly  
468 interesting because we hypothesize that the genes oppositely regulated by *REV/KAN* may have a  
469 dual role in both development and stress responses. Indeed, Song et al., (2016) discovered that  
470 *ABIG1* appeared to be a ‘hub’ gene for the ABA-responsive pathway that may regulate gene  
471 expression in all aspects of ABA-related processes. However, it has yet to be determined if  
472 ABA-regulated formation of adaxial-abaxial patterning occurs through *mir165/166* and an *HD-*  
473 *ZIP III*. Much less is known about how ABA is involved in regulation of *KAN* and its  
474 transcriptional repression during seed germination and leaf development. As such, more detailed  
475 studies will be needed to determine the interactions among *HD-ZIP IIIs*, *HD-ZIP II*s, and *KAN* in  
476 mediating ABA action during early meristem development, polarity formation, and stress  
477 responses. Therefore, it will be interesting to reveal if additional regulatory networks integrate  
478 responses by which leaf development can be adjusted in response to the changing environment.

479

#### 480 **The evolutionary relationship among *HD-ZIP II* genes hints at ancient roles in leaf** 481 **development and stress responses**

482 The HD-ZIP I, II, III, and IV proteins are remarkably convergent within the HD and ZIP domains,  
483 with other domains distinguishing each HD-ZIP gene family. HD-ZIP I and II genes are usually  
484 involved in environmental signaling responses. HD-ZIP II members contain a unique seven  
485 amino acid motif (CP-X-CER-X) at the carboxy terminus, which may be responsible for the  
486 interaction with other proteins that sense environmental signals. Genome-wide analysis in  
487 *Medicago truncatula* showed that the HD-ZIP genes had distinctive, tissue-specific patterns and  
488 divergent responses to various stresses (Li et al., 2020). In rice, *small grain and dwarf 2* (*SGD2*),  
489 encoding an *HD-ZIP II* transcriptional repressor, controls plant leaf and panicle development by



490 regulating gibberellin biosynthesis (Chen et al., 2019). Thus, it is quite possible that the tissue-  
491 specific regulation of *HD-ZIP II* genes could balance growth and stress responses.

492 Six out of ten HD-ZIP II proteins in *Arabidopsis* include an EAR-motif (LXLXL) at the  
493 amino terminus that is crucial for transcriptional repression. Consistent with this hypothesis, the  
494 HD-ZIP II protein HAT1 forms a transcriptional repression complex with TPL to inhibit target  
495 genes that modulate the anthocyanin biosynthesis pathway (Zheng et al., 2019). The molecular  
496 mechanisms by which those HD-ZIP IIs bind to TPL to repress downstream transcriptional  
497 activities in development and stress responses remain to be identified. In *Eucalyptus*  
498 *camaldulensis*, overexpression of a homologue of *ABIG1*, *EcHB1*, results in increased density of  
499 cells and chloroplasts in leaves, a higher photosynthesis rate, as well as drought tolerant features  
500 (Sasaki et al., 2019). It will be interesting to see if EcHB1 can physically interact with EcTPL.

501 Understanding how *HD-ZIP II* genes function in leaf development will give us a more  
502 complete view of the role of these genes throughout the plant kingdom. As the expression levels  
503 of these genes are influenced by environmental factors (red light or drought, depending on the  
504 family member) and these genes interact with a major developmental pathway, the *HD-ZIP II*  
505 genes are excellent candidates as hubs for integrating intrinsic developmental pathways with  
506 environmental signaling pathways.

507

## 508 **Acknowledgements**

509 Financial support from the National Science Foundation in America is gratefully acknowledged.  
510 A small part of the data was collected in the lab of Dr. Kathryn Barton at the Carnegie Institute  
511 for Science. We thank Kathy Barton and the Barton lab members for providing technical support  
512 and comments for the manuscript.

513

## 514 **Data availability statement**

515 All data generated or analyzed during this study are included in this published article and its  
516 supplementary information files.

517

## 518 **References**

- 519 **Borghi L. 2010.** Inducible Gene Expression Systems for Plants. In: Hennig L, Köhler C, eds.  
520 Methods in Molecular Biology. Plant Developmental Biology: Methods and Protocols. Totowa,  
521 NJ: Humana Press, 65–75.
- 522 **Bou-Torrent J, Salla-Martret M, Brandt R, Musielak T, Palauqui J-C, Martínez-García**  
523 **JF, Wenkel S. 2012.** ATHB4 and HAT3, two class II HD-ZIP transcription factors, control leaf  
524 development in Arabidopsis. *Plant Signaling & Behavior* **7**: 1382–1387.
- 525 **Bowman JL, Eshed Y, Baum SF. 2002.** Establishment of polarity in angiosperm lateral organs.  
526 *Trends in Genetics* **18**: 134–141.
- 527 **Brandt R, Salla-Martret M, Bou-Torrent J, Musielak T, Stahl M, Lanz C, Ott F, Schmid**  
528 **M, Greb T, Schwarz M, et al., 2012.** Genome-wide binding-site analysis of REVOLUTA  
529 reveals a link between leaf patterning and light-mediated growth responses. *The Plant Journal:*  
530 *For Cell and Molecular Biology* **72**: 31–42.
- 531 **Byrne ME. 2006.** Shoot meristem function and leaf polarity: the role of class III HD-ZIP genes.  
532 *PLoS genetics* **2**: e89.
- 533 **Carabelli M, Possenti M, Sessa G, Ruzza V, Morelli G, Ruberti I. 2018.** Arabidopsis HD-Zip  
534 II proteins regulate the exit from proliferation during leaf development in canopy shade. *Journal*  
535 *of Experimental Botany* **69**: 5419–5431.
- 536 **Carabelli M, Sessa G, Baima S, Morelli G, Ruberti I. 1993.** The Arabidopsis Athb-2 and -4  
537 genes are strongly induced by far-red-rich light. *The Plant Journal: For Cell and Molecular*  
538 *Biology* **4**: 469–479.
- 539 **Causier B, Ashworth M, Guo W, Davies B. 2012.** The TOPLESS interactome: a framework  
540 for gene repression in Arabidopsis. *Plant Physiology* **158**: 423–438.
- 541 **Ciarbelli AR, Ciolfi A, Salvucci S, Ruzza V, Possenti M, Carabelli M, Fruscalzo A, Sessa G,**  
542 **Morelli G, Ruberti I. 2008.** The Arabidopsis homeodomain-leucine zipper II gene family:  
543 diversity and redundancy. *Plant Molecular Biology* **68**: 465–478.

- 544 **Clough SJ, Bent AF. 1998.** Floral dip: a simplified method for *Agrobacterium*-mediated  
545 transformation of *Arabidopsis thaliana*. *The Plant Journal: For Cell and Molecular Biology* **16**:  
546 735–743.
- 547 **Curtis MD, Grossniklaus U. 2003.** A Gateway Cloning Vector Set for High-Throughput  
548 Functional Analysis of Genes in *Planta*. *Plant Physiology* **133**: 462–469.
- 549 **Elhiti M, Stasolla C. 2009.** Structure and function of homodomain-leucine zipper (HD-Zip)  
550 proteins. *Plant Signaling & Behavior* **4**: 86–88.
- 551 **Emery JF, Floyd SK, Alvarez J, Eshed Y, Hawker NP, Izhaki A, Baum SF, Bowman JL.**  
552 **2003.** Radial patterning of *Arabidopsis* shoots by class III HD-ZIP and KANADI genes. *Current*  
553 *biology: CB* **13**: 1768–1774.
- 554 **Eshed Y, Baum SF, Perea JV, Bowman JL. 2001.** Establishment of polarity in lateral organs  
555 of plants. *Current biology: CB* **11**: 1251–1260.
- 556 **Gleissberg S, Kim M, Jernstedt J, Sinha N. 2000.** The Regulation of Dorsiventral Symmetry  
557 in Plants. In: Kato M, ed. *The Biology of Biodiversity*. Tokyo: Springer Japan, 223–241.
- 558 **Hawker NP, Bowman JL. 2004.** Roles for Class III HD-Zip and KANADI genes in  
559 *Arabidopsis* root development. *Plant Physiology* **135**: 2261–2270.
- 560 **Hermesen R, Ursem B, ten Wolde PR. 2010.** Combinatorial gene regulation using auto-  
561 regulation. *PLoS computational biology* **6**: e1000813.
- 562 **Husbands AY, Chitwood DH, Plavskin Y, Timmermans MCP. 2009.** Signals and prepatterns:  
563 new insights into organ polarity in plants. *Genes & Development* **23**: 1986–1997.
- 564 **Ichihashi Y, Tsukaya H. 2015.** Behavior of Leaf Meristems and Their Modification. *Frontiers*  
565 *in Plant Science* **6**: 1060.
- 566 **Kerstetter RA, Bollman K, Taylor RA, Bomblies K, Poethig RS. 2001.** KANADI regulates  
567 organ polarity in *Arabidopsis*. *Nature* **411**: 706–709.

- 568 **Kim Y-S, Kim S-G, Lee M, Lee I, Park H-Y, Seo PJ, Jung J-H, Kwon E-J, Suh SW, Paek**  
569 **K-H, et al., 2008.** HD-ZIP III activity is modulated by competitive inhibitors via a feedback loop  
570 in Arabidopsis shoot apical meristem development. *The Plant Cell* **20**: 920–933.
- 571 **Leyser O. 2009.** The control of shoot branching: an example of plant information processing.  
572 *Plant, Cell & Environment* **32**: 694–703.
- 573 **Lin W -c. 2003.** The Arabidopsis LATERAL ORGAN BOUNDARIES-Domain Gene  
574 ASYMMETRIC LEAVES2 Functions in the Repression of KNOX Gene Expression and in  
575 Adaxial-Abaxial Patterning. *THE PLANT CELL ONLINE* **15**: 2241–2252.
- 576 **Liu T, Longhurst AD, Talavera-Rauh F, Hokin SA, Barton MK. 2016.** The Arabidopsis  
577 transcription factor ABIG1 relays ABA signaled growth inhibition and drought induced  
578 senescence (R Amasino, Ed.). *eLife* **5**: e13768.
- 579 **Long JA, Ohno C, Smith ZR, Meyerowitz EM. 2006.** TOPLESS regulates apical embryonic  
580 fate in Arabidopsis. *Science (New York, N.Y.)* **312**: 1520–1523.
- 581 **McConnell JR, Barton MK. 1998.** Leaf polarity and meristem formation in Arabidopsis.  
582 *Development (Cambridge, England)* **125**: 2935–2942.
- 583 **McConnell JR, Emery J, Eshed Y, Bao N, Bowman J, Barton MK. 2001.** Role of  
584 PHABULOSA and PHAVOLUTA in determining radial patterning in shoots. *Nature* **411**: 709–  
585 713.
- 586 **Meng L-S, Wang Z-B, Cao X-Y, Zhang H-J, Wang Y-B, Jiang J-H. 2016.** ASYMMETRIC  
587 LEAVES2-LIKE15 gene, a member of AS2/LOB family, shows a dual abaxializing or  
588 adaxializing function in Arabidopsis lateral organs. *Acta Physiologiae Plantarum* **38**: 240.
- 589 **Merelo P, Ram H, Pia Caggiano M, Ohno C, Ott F, Straub D, Graeff M, Cho SK, Yang**  
590 **SW, Wenkel S, et al., 2016.** Regulation of *MIR165/166* by class II and class III homeodomain  
591 leucine zipper proteins establishes leaf polarity. *Proceedings of the National Academy of*  
592 *Sciences* **113**: 11973–11978.

- 593 **Morelli G, Baima S, Carabelli M, Di Cristina M, Lucchetti S, Sessa G, Steindler C, Ruberti**  
594 **I. 1998.** Homeodomain-Leucine Zipper Proteins in the Control of Plant Growth and  
595 Development. In: Lo Schiavo F, Last RL, Morelli G, Raikhel NV, eds. NATO ASI Series.  
596 Cellular Integration of Signalling Pathways in Plant Development. Berlin, Heidelberg: Springer,  
597 251–262.
- 598 **Norberg M, Holmlund M, Nilsson O. 2005.** The BLADE ON PETIOLE genes act redundantly  
599 to control the growth and development of lateral organs. *Development (Cambridge, England)*  
600 **132:** 2203–2213.
- 601 **Pauwels L, Barbero GF, Geerinck J, Tilleman S, Grunewald W, Pérez AC, Chico JM,**  
602 **Bossche RV, Sewell J, Gil E, et al., 2010.** NINJA connects the co-repressor TOPLESS to  
603 jasmonate signalling. *Nature* **464:** 788–791.
- 604 **Prigge MJ, Otsuga D, Alonso JM, Ecker JR, Drews GN, Clark SE. 2005.** Class III  
605 homeodomain-leucine zipper gene family members have overlapping, antagonistic, and distinct  
606 roles in Arabidopsis development. *The Plant Cell* **17:** 61–76.
- 607 **Reinhart BJ, Liu T, Newell NR, Magnani E, Huang T, Kerstetter R, Michaels S, Barton**  
608 **MK. 2013.** Establishing a framework for the Ad/abaxial regulatory network of Arabidopsis:  
609 ascertaining targets of class III homeodomain leucine zipper and KANADI regulation. *The Plant*  
610 *Cell* **25:** 3228–3249.
- 611 **Reymond MC, Brunoud G, Chauvet A, Martínez-García JF, Martin-Magniette M-L,**  
612 **Monéger F, Scutt CP. 2012.** A light-regulated genetic module was recruited to carpel  
613 development in Arabidopsis following a structural change to SPATULA. *The Plant Cell* **24:**  
614 2812–2825.
- 615 **Ruberti I, Sessa G, Lucchetti S, Morelli G. 1991.** A novel class of plant proteins containing a  
616 homeodomain with a closely linked leucine zipper motif. *The EMBO journal* **10:** 1787–1791.
- 617 **Rueda EC, Dezar CA, Gonzalez DH, Chan RL. 2005.** Hahb-10, a sunflower homeobox-  
618 leucine zipper gene, is regulated by light quality and quantity, and promotes early flowering  
619 when expressed in Arabidopsis. *Plant & Cell Physiology* **46:** 1954–1963.

- 620 **Sawa S, Ohgishi M, Goda H, Higuchi K, Shimada Y, Yoshida S, Koshiba T. 2002.** The  
621 HAT2 gene, a member of the HD-Zip gene family, isolated as an auxin inducible gene by DNA  
622 microarray screening, affects auxin response in Arabidopsis. *The Plant Journal: For Cell and*  
623 *Molecular Biology* **32**: 1011–1022.
- 624 **Sawa S, Watanabe K, Goto K, Liu YG, Shibata D, Kanaya E, Morita EH, Okada K. 1999.**  
625 FILAMENTOUS FLOWER, a meristem and organ identity gene of Arabidopsis, encodes a  
626 protein with a zinc finger and HMG-related domains. *Genes & Development* **13**: 1079–1088.
- 627 **Schena M, Davis RW. 1992.** HD-Zip proteins: members of an Arabidopsis homeodomain  
628 protein superfamily. *Proceedings of the National Academy of Sciences of the United States of*  
629 *America* **89**: 3894–3898.
- 630 **Sessa G, Carabelli M, Possenti M, Morelli G, Ruberti I. 2018.** Multiple Links between HD-  
631 Zip Proteins and Hormone Networks. *International Journal of Molecular Sciences* **19**.
- 632 **Sessa G, Carabelli M, Sassi M, Ciolfi A, Possenti M, Mitterpergher F, Becker J, Morelli G,**  
633 **Ruberti I. 2005.** A dynamic balance between gene activation and repression regulates the shade  
634 avoidance response in Arabidopsis. *Genes & Development* **19**: 2811–2815.
- 635 **Sessa G, Morelli G, Ruberti I. 1993.** The Athb-1 and -2 HD-Zip domains homodimerize  
636 forming complexes of different DNA binding specificities. *The EMBO journal* **12**: 3507–3517.
- 637 **Shchennikova AV, Slugina MA, Beletsky AV, Filyushin MA, Mardanov AA, Shulga OA,**  
638 **Kochieva EZ, Ravin NV, Skryabin KG. 2018.** The YABBY Genes of Leaf and Leaf-Like Organ  
639 Polarity in Leafless Plant *Monotropa hypopitys*. *International Journal of Genomics* **2018**: 1–16.
- 640 **Siegfried KR, Eshed Y, Baum SF, Otsuga D, Drews GN, Bowman JL. 1999.** Members of the  
641 YABBY gene family specify abaxial cell fate in Arabidopsis. *Development (Cambridge,*  
642 *England)* **126**: 4117–4128.
- 643 **Smith ZR, Long JA. 2010.** Control of Arabidopsis apical-basal embryo polarity by antagonistic  
644 transcription factors. *Nature* **464**: 423–426.

- 645 **Staudt A-C, Wenkel S. 2011.** Regulation of protein function by ‘microProteins’. *EMBO reports*  
646 **12:** 35–42.
- 647 **Steindler C, Matteucci A, Sessa G, Weimar T, Ohgishi M, Aoyama T, Morelli G, Ruberti I.**  
648 **1999.** Shade avoidance responses are mediated by the ATHB-2 HD-zip protein, a negative  
649 regulator of gene expression. *Development (Cambridge, England)* **126:** 4235–4245.
- 650 **Szemenyei H, Hannon M, Long JA. 2008.** TOPLESS Mediates Auxin-Dependent  
651 Transcriptional Repression During Arabidopsis Embryogenesis. *Science* **319:** 1384–1386.
- 652 **Tang G, Reinhart BJ, Bartel DP, Zamore PD. 2003.** A biochemical framework for RNA  
653 silencing in plants. *Genes & Development* **17:** 49–63.
- 654 **Tao Q, Guo D, Wei B, Zhang F, Pang C, Jiang H, Zhang J, Wei T, Gu H, Qu L-J, et al.,**  
655 **2013.** The TIE1 Transcriptional Repressor Links TCP Transcription Factors with  
656 TOPLESS/TOPLESS-RELATED Corepressors and Modulates Leaf Development in  
657 *Arabidopsis*. *The Plant Cell* **25:** 421–437.
- 658 **Turchi L, Carabelli M, Ruzza V, Possenti M, Sassi M, Peñalosa A, Sessa G, Salvi S, Forte**  
659 **V, Morelli G, et al., 2013.** Arabidopsis HD-Zip II transcription factors control apical embryo  
660 development and meristem function. *Development (Cambridge, England)* **140:** 2118–2129.
- 661 **Waites R, Hudson A. 1995.** phantastica: a gene required for dorsoventrality of leaves in  
662 *Antirrhinum majus*. *Development* **121:** 2143–2154.
- 663 **Wenkel S, Emery J, Hou B-H, Evans MMS, Barton MK. 2007.** A Feedback Regulatory  
664 Module Formed by LITTLE ZIPPER and HD-ZIPIII Genes. *The Plant Cell* **19:** 3379–3390.
- 665 **Zhang W, Yu R. 2014.** Molecule mechanism of stem cells in Arabidopsis thaliana.  
666 *Pharmacognosy Reviews* **8:** 105.
- 667 **Zúñiga-Mayo VM, Marsch-Martínez N, de Folter S. 2012.** JAIBA, a class-II HD-ZIP  
668 transcription factor involved in the regulation of meristematic activity, and important for correct  
669 gynoecium and fruit development in Arabidopsis. *The Plant Journal: For Cell and Molecular*  
670 *Biology* **71:** 314–326.

671 **Figure legends**

672

673 **Fig 1. Expression analysis of *ABIG1*.** (A) Schematic representation of the HDZIP II genes  
674 regulated by *REV* and *KAN*. Green boxes indicate direct target, green cycles indicate indirect  
675 targets. ‘Up’ indicates up-regulation, ‘Down’ indicates down-regulation. NC, indicates no  
676 significant changes. (B) Gus staining expression analysis in *pABIG1::GUS*-transformed  
677 *Arabidopsis* plants. Five-day-old seedlings showing expression in the vascular tissue, Bars = 2  
678 mm. (C) cotyledons, (D) root, and (E) inflorescence. Bars = 2mm for B, Bar=50  $\mu$ m for C, D,  
679 and E. (e) Longitudinal section of the shoot apex at 7 days showing leaf primordia. (F) Cross-  
680 section of young and (G) mature leaves in the shoot apex. Bars = 100  $\mu$ m for F-G.

681

682 **Fig 2. Overexpression of *ABIG1* induces Adaxial-abaxial Polarity Defects.** Phenotype of (A)  
683 WT and (B) dwarf *35S::ABIG1* seedlings. Scanning electron microscopy of (C) WT and (D)  
684 *35S::ABIG1* narrowed leaf blade and leaf primordia showing up-curved phenotype, Bars = 50  $\mu$ m.  
685 (E) WT and severe dwarf *35S:ABIG1* of (F) mature plants and (G) reduced inflorescence. (H-K)  
686 Quantitative measure of leaf size and shape in WT and *35S:ABIG1* 12-day-old seedlings. The y-  
687 axis shows the length of true leaf length (H), leaf perimeter (I), area (J) and cell numbers (k).  
688 Measurements were calculated relative to the wild type in three independent biological  
689 experiments, \*\*\*  $P < 0.001$  by Student’s *t*-test. Wild type plants with normal vein pattern in  
690 cleared rosette leaves (L), flat leaf blade (M), and vascular bundle organization (P). (P) and (Q)  
691 are close-up images for (N) and (O) in the black box area, respectively. *35S::ABIG1* showed  
692 narrow leaf blade and abnormal vein pattern in cleared leaves (M), extreme up-curved leaf blade  
693 (O), and disorganized vascular bundle (Q). Bars = 50  $\mu$ m for M and N. Bars = 10  $\mu$ m for O and P.  
694 Phenotype of (S) showed up curled leaves in *35S::HAT14* seedlings and (U) rosette leaves. Bars  
695 = 50  $\mu$ m for M and N. Bars = 10  $\mu$ m for O and P.

696

697 **Fig 3. Mutations in *ABIG1* and *REV* affect leaf adaxial formation.** (A) Wild-type and (B)  
698 enhancer trap *abig1-1* mutant that showed down-curved leaves. (C-D) Leaves of a *rev-6* and a  
699 *rev-6 abig1-1* double mutant exhibited downward leaf curling, with the double mutant showing  
700 enhanced phenotypes. (E-H) A *rev-10d*, *rev-10d abig1-1* double mutant exhibited upward leaf



701 curling phenotypes. (I-J) Leaves of *kan123* triple, *kan123abig1-1* quadruple mutant. Bars =  
702 5mm.

703

704 **Fig 4. The genetic interaction between ABIG1 and KAN-REV signaling.**

705 (A) *rev-6* mutant. (B-C) *abig1-1 rev-6* showed outgrowth of arrested inflorescence with  
706 terminated single silique. White arrowhead indicated the arrested axillary bud. (D-F) double  
707 mutant displayed radialized leaf-like structure in cauline leaves. Bar = 1cm for A-E, Bar = 0.5cm  
708 for F. (G) *kan1-2kan2-1kan3-1* mutant, (H) a close-up image of leaf finger in *kan1-2kan2-1kan3-1*  
709 mutant. (I) *abig1-1kan1-2kan2-1kan3-1* mutant, (J) a close-up image of *abig1-1kan1-2kan2-1*  
710 *kan3-1* displayed smooth leaf blade. Bar = 1 cm in (G)-(J). Bar = cm in (L)-(K).

711

712 **Fig 5. TPL genetically interacts with ABIG1.** (A) WT, and (B) *abig1-1* seedlings at 10 days  
713 after germination. (C-E) The *tpl-1* mutant displayed pin-shaped, single, and fused cotyledon  
714 phenotype at the permissive 22 °C. (F) A true leaf emerged from a fused cotyledon in the *tpl-1*  
715 mutant. White arrowhead indicated flatten leaf in *tpl-1* mutant. (F-G) The *abig1-1 tpl-1* double  
716 mutant had an enhanced phenotype. White arrowheads indicate shoot-to-root phenotype in the  
717 double mutant. Double roots were observed when grew at 22 °C. (I) A cup-shaped true leaf  
718 formed in the *abig1-1 tpl-1* mutant. (J-K) GUS expression pattern of *abig1-1* in *abig1-1 tpl-1*  
719 mutant. Black arrowheads indicate GUS expression. (L) *abig1-1 tpl/+* was a dwarf mutant  
720 compared with the single mutant. Bar = 5mm.

721

722 **Fig 6. ABIG1 interacts with TPL *in vitro* and *in vivo*.** (A) Yeast-two-hybrid assay to test the  
723 interaction between full-length or truncated versions of ABIG1 and TPL proteins. *B-gal* assays  
724 were used to indicate the interaction. Constructs 1-7 present the different truncated versions of  
725 the ABIG1 protein; 1, ABIG1N (amino acid, 1-52); 2, ABIG1NA (aa, 1-52; LXLXL changed to  
726 AXAXA); 3, ABIGNHD(aa, 1-202); 4, ABIGHD (53-202); 5, ABIG1HDC (53-287); 6,  
727 ABIG1C (203-287); 7, full-length ABIG1; and 8, REV as a negative control. (B) BiFC assays  
728 were used to test the ABIG1 interaction with TPL in *N. benthamiana* leaves. Yellow dots and red  
729 arrowheads indicate a positive signal. There was no signal detected from the negative control  
730 REV\*-MEK. Bars = 10 μm.

731

732 **Supplementary data**

733 **Fig S1. Class II HD-ZIPs are in response to 60-min dexamethasone treatment with and**  
734 **without cycloheximide as measured by qRT-PCR.** The relative expression values are means  
735 of three biological replicates and three technical replicates. Arabidopsis seeds were germinated  
736 in liquid medium and grow for 12 days and then treated with dexmethasone for 60 minute or pre-  
737 treated with cycloheximide for 20 minutes. PCR was done using gene-specific primers (see  
738 Supplemental Table 2) in technical triplicates on a LightCycler 480 system. The ratio of  
739 experimental target mRNA to an ACTIN control for each sample was calculated by Applied  
740 Biosystems software. An average for the biological replicates and standard deviation were  
741 calculated in Excel. ‘++’ indicates dexamethasone and cycloheximide treatment. ‘- -’ indicates  
742 mock control without any treatment. A. HDZIPIIs in response to 60-min dexamethasone  
743 treatment with and without cycloheximide as measure were regulated by REV, B. HDZIPIIs  
744 were regulated by KAN.

745

746 **Table S1. ABIG1 enhances the *tpl-1* mutant phenotype.** Value are means of three replicates  
747 SD. Statistical significance of the new phenotype in the *Student t-test* ( $P < 0.05$ ) is represented by  
748 an asterisk.

749 **Table S2. Primer sequences for genotyping and cloning.**

750

751

**Fig 1. Expression analysis of *ABIG1*.** (A) Schematic representation of the HDZIP II genes regulated by *REV* and *KAN*. Green boxes indicate direct target, green circles indicate indirect targets. ‘Up’ indicates up-regulation, ‘Down’ indicates down-regulation. NC, indicates no significant changes. (B) Gus staining expression analysis in *pABIG1::GUS*-transformed *Arabidopsis* plants. Five-day-old seedlings showing expression in the vascular tissue, Bars = 2 mm. (C) cotyledons, (D) root, and (E) inflorescence. Bars = 2mm for B, Bar=50  $\mu$ m for C, D, and E. (e) Longitudinal section of the shoot apex at 7 days showing leaf primordia. (F) Cross-section of young and (G) mature leaves in the shoot apex. Bars = 100  $\mu$ m for F-G.

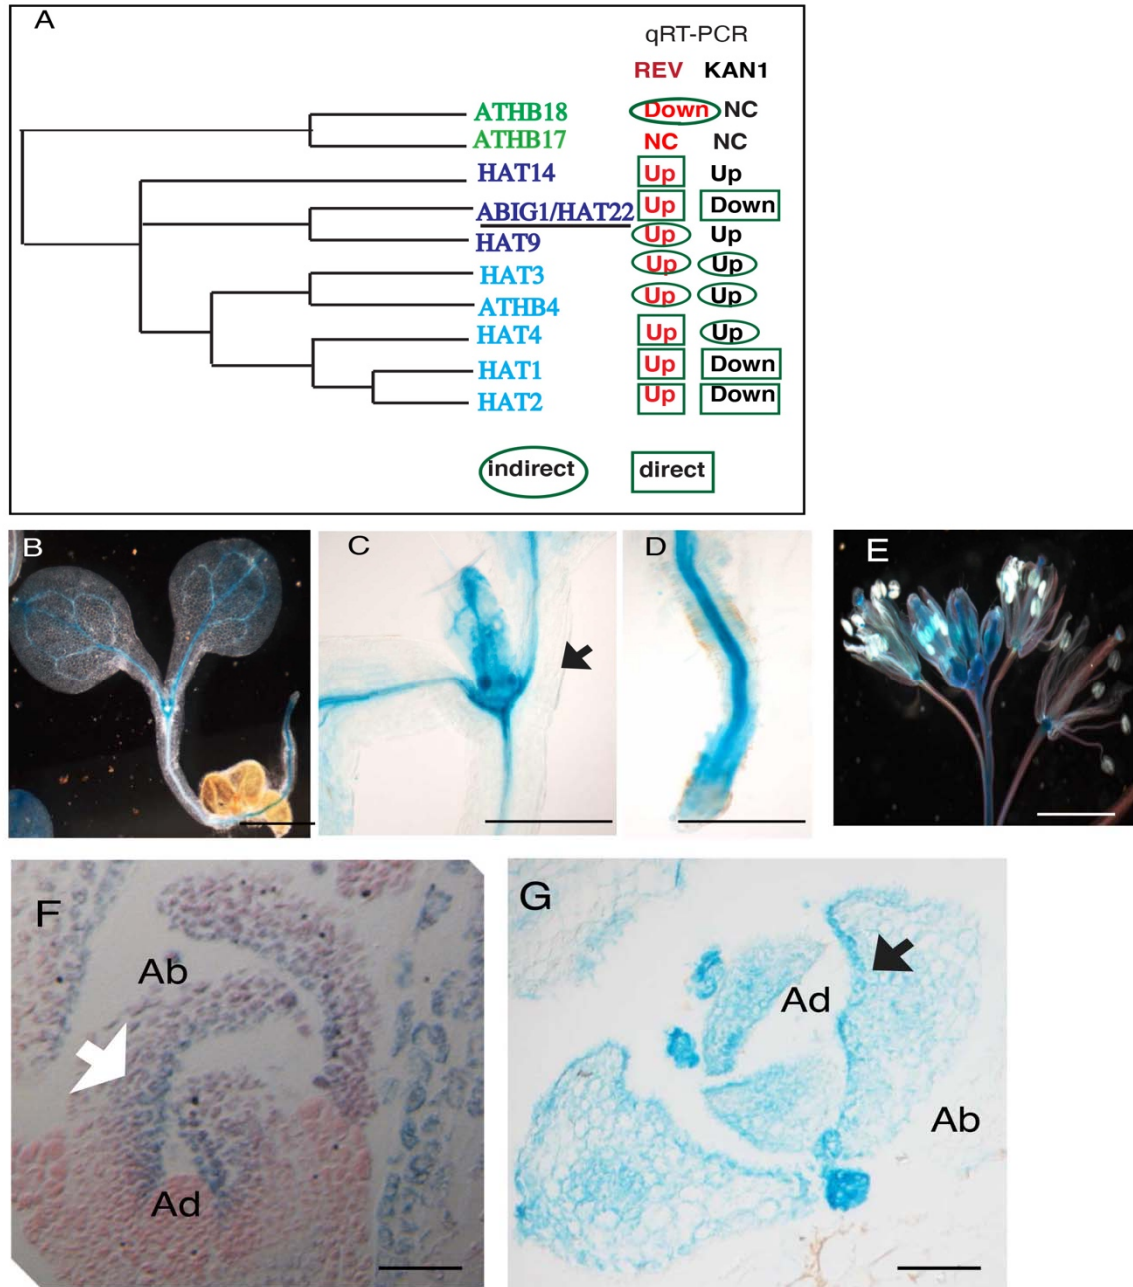

**Fig 2. Overexpression of *ABIG1* induces Adaxial-abaxial Polarity Defects.** Phenotype of (A) WT and (B) dwarf *35S::ABIG1* seedlings. Scanning electron microscopy of (C) WT and (D) *35S::ABIG1* narrowed leaf blade and leaf primordia showing up-curved phenotype, Bars = 50  $\mu\text{m}$ . (E) WT and severe dwarf *35S:ABIG1* of (F) mature plants and (G) reduced inflorescence. (H-K) Quantitative measure of leaf size and shape in WT and *35S:ABIG1* 12-day-old seedlings. The y-axis shows the length of true leaf length (H), leaf perimeter (I), area (J) and cell numbers (k). Measurements were calculated relative to the wild type in three independent biological experiments, \*\*\*  $P < 0.001$  by Student's *t*-test. Wild type plants with normal vein pattern in cleared rosette leaves (L), flat leaf blade (M), and vascular bundle organization (P). (P) and (Q) are close-up images for (N) and (O) in the black box area, respectively. *35S::ABIG1* showed narrow leaf blade and abnormal vein pattern in cleared leaves (M), extreme up-curved leaf blade (O), and disorganized vascular bundle (Q). Bars = 50  $\mu\text{m}$  for M and N. Bars = 10  $\mu\text{m}$  for O and P. Phenotype of (S) showed up curled leaves in *35S::HAT14* seedlings and (U) rosette leaves. Bars = 50  $\mu\text{m}$  for M and N. Bars = 10  $\mu\text{m}$  for O and P.

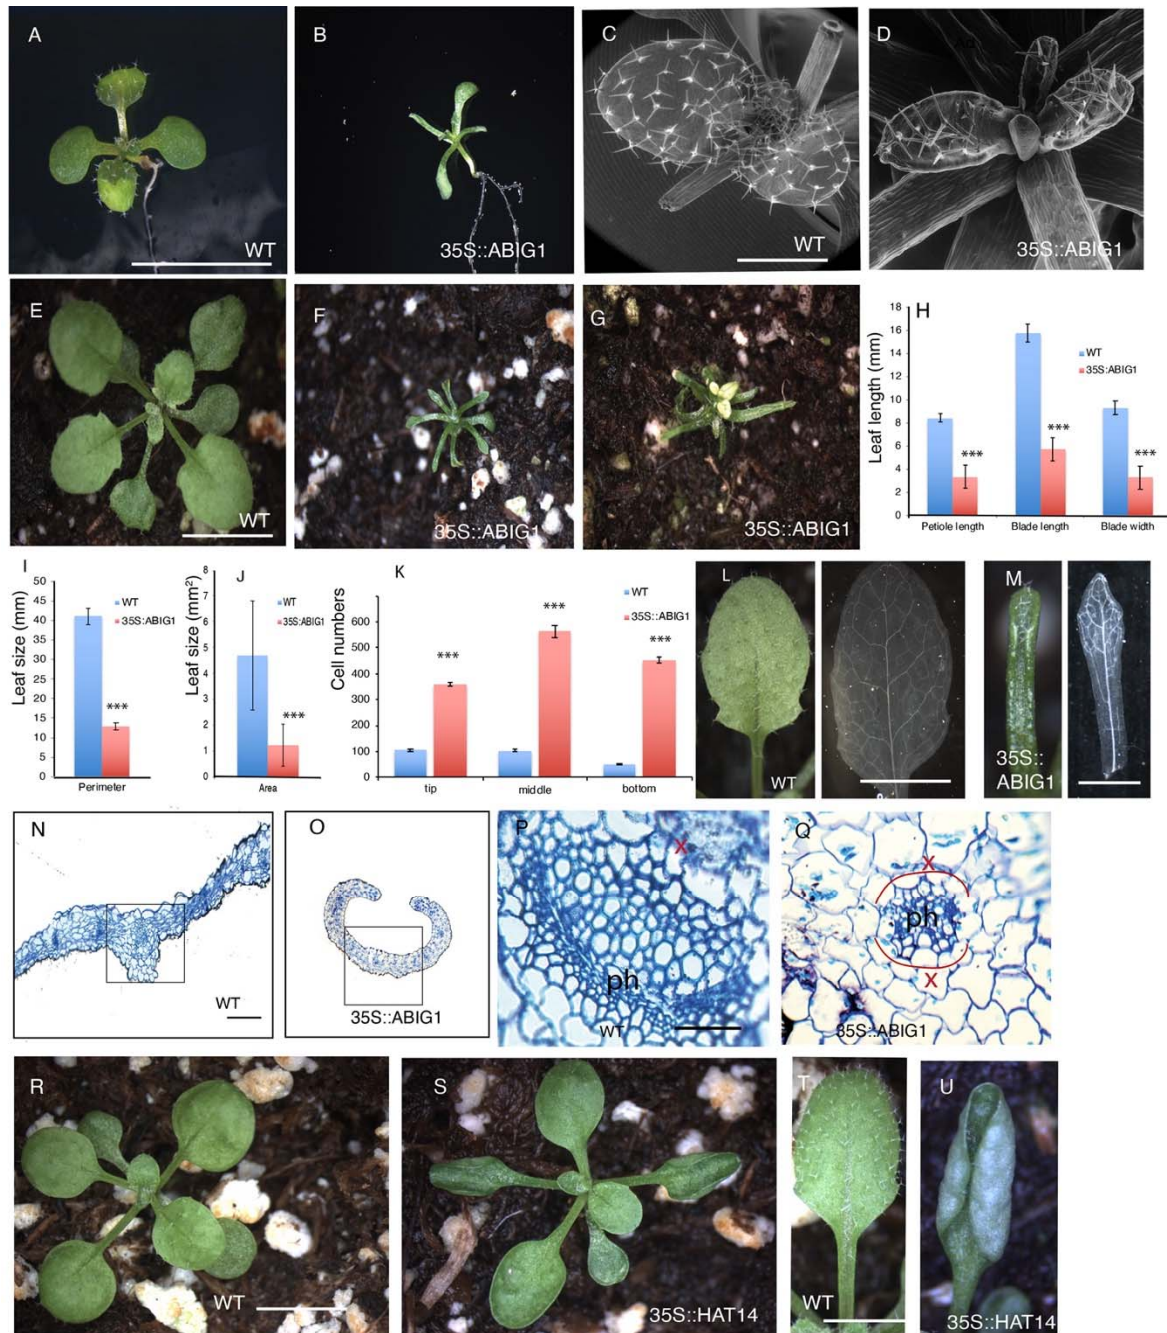

**Fig 3. Mutations in ABIG1 and REV affect leaf adaxial formation.** (A) Wild-type and (B) enhancer trap *abig1-1* mutant that showed down-curved leaves. (C-D) Leaves of a *rev-6* and a *rev-6 abig1-1* double mutant exhibited downward leaf curling, with the double mutant showing enhanced phenotypes. (E-H) A *rev-10d*, *rev-10d abig1-1* double mutant exhibited upward leaf curling phenotypes. (I-J) Leaves of *kan123* triple, *kan123abig1-1* quadruple mutant. Bars = 5mm.

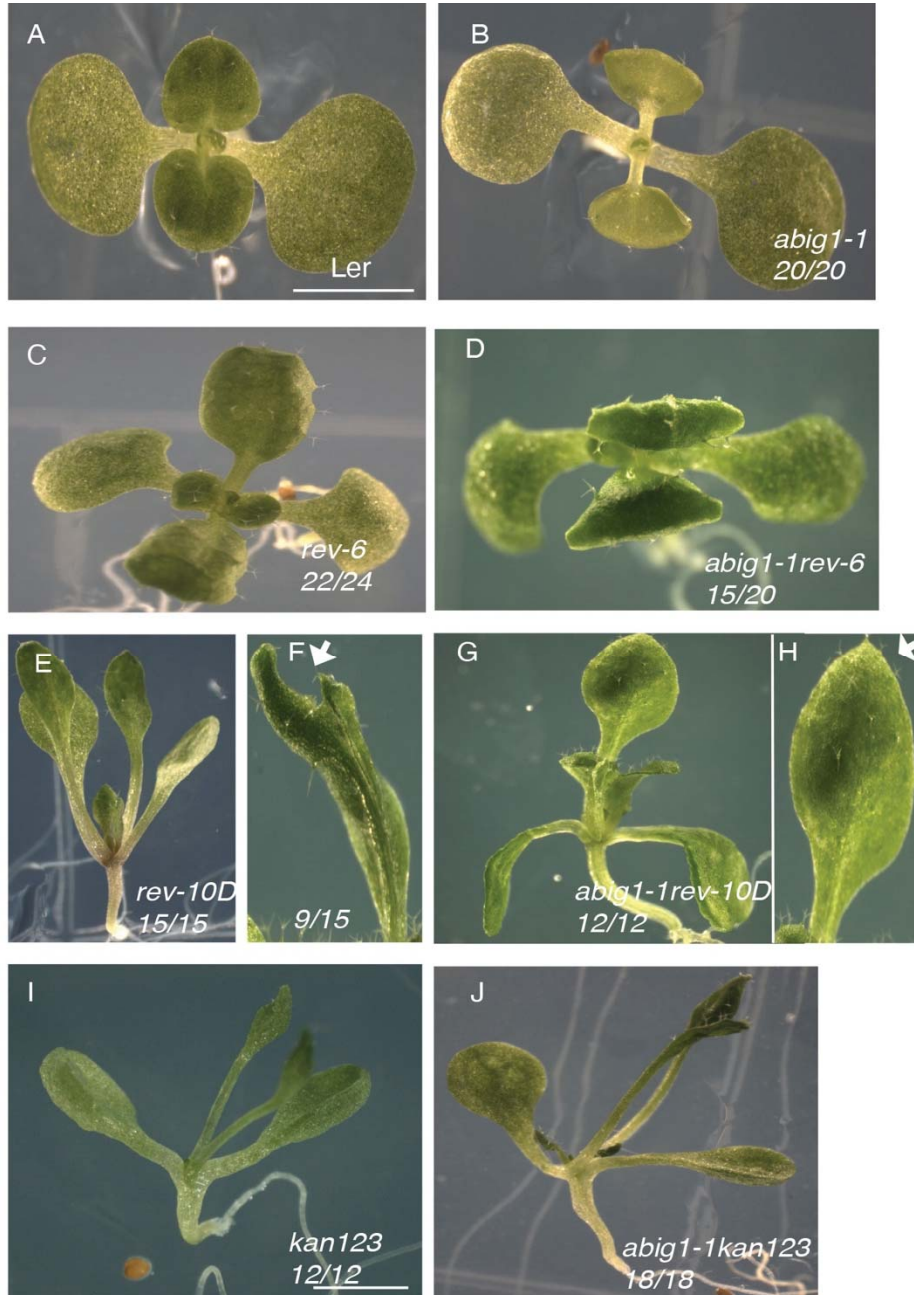

**Fig 4. The genetic interaction between ABIG1 and REV-KAN signaling.**

(A) *rev-6* mutant. (B-C) *abig1-1 rev-6* showed outgrowth of arrested inflorescence with terminated single silique. White arrowhead indicated the arrested axillary bud. (D-F) double mutant displayed radialized leaf-like structure in cauline leaves. Bar = 1cm for A-E, Bar = 0.5cm for F. (G) *kan1-2kan2-1kan3-1* mutant, (H) a close-up image of leaf finger in *kan1-2kan2-1kan3-1* mutant. (I) *abig1-1kan1-2kan2-1kan3-1* mutant, (J) a close-up image of *abig1-1kan1-2kan2-1kan3-1* displayed smooth leaf blade. Bar = 1cm in (G)-(J). Bar = cm in (L)-(K).

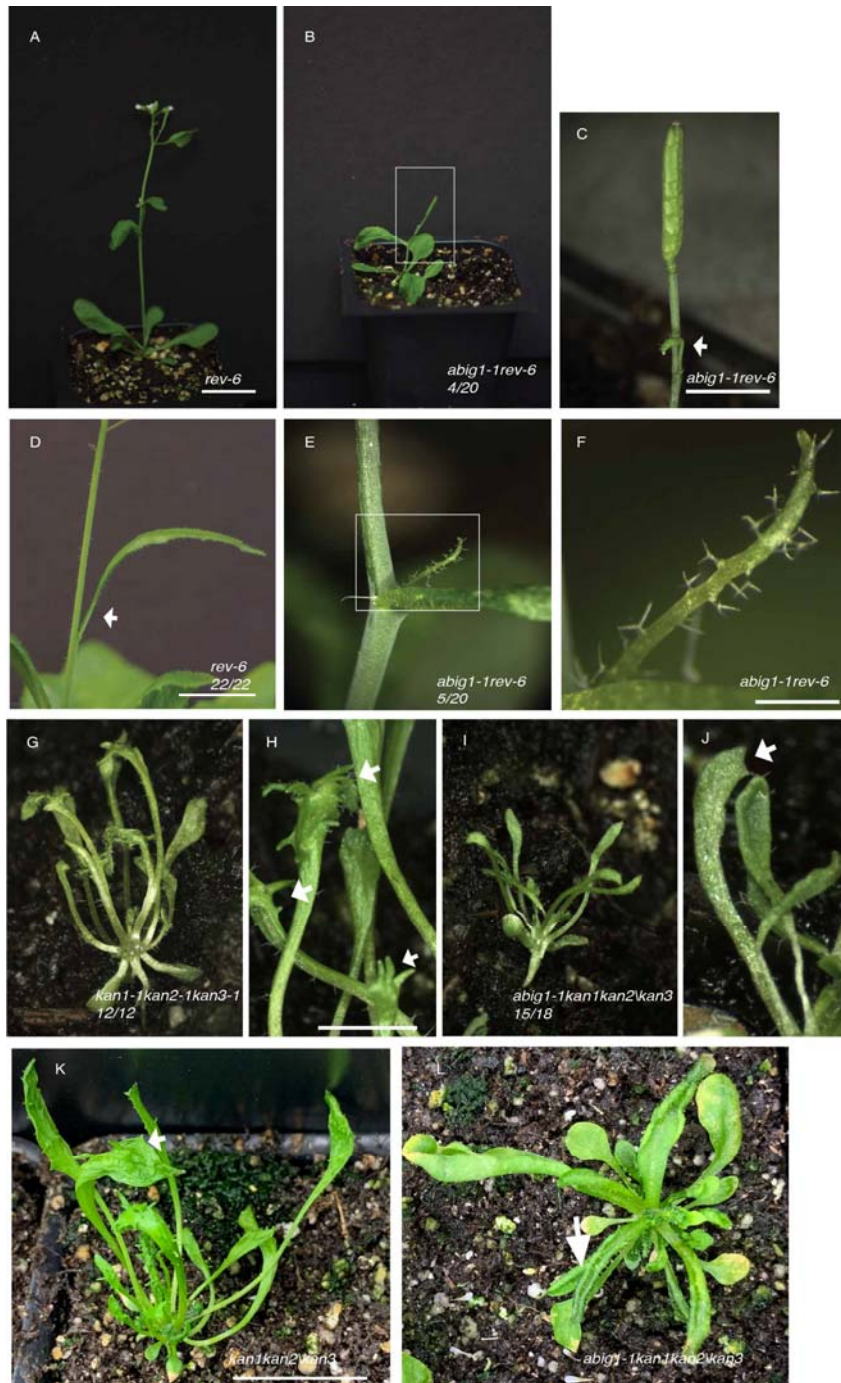

**Fig 5. *TPL* genetically interacts with *ABIG1*.** (A) WT, and (B) *abig1-1* seedlings at 10 days after germination. (C-E) The *tpl-1* mutant displayed pin-shaped, single, and fused cotyledon phenotype at the permissive 22 °C. (F) A true leaf emerged from a fused cotyledon in the *tpl-1* mutant. White arrowhead indicated flatten leaf in *tpl-1* mutant. (F-G) The *abig1-1 tpl-1* double mutant had an enhanced phenotype. White arrowheads indicate shoot-to-root phenotype in the double mutant. Double roots were observed when grew at 22 °C. (I) A cup-shaped true leaf formed in the *abig1-1 tpl-1* mutant. (J-K) GUS expression pattern of *abig1-1* in *abig1-1 tpl-1* mutant. Black arrowheads indicate GUS expression. (L) *abig1-1 tpl-1/+* was a dwarf mutant compared with the single mutant. Bar = 5mm.

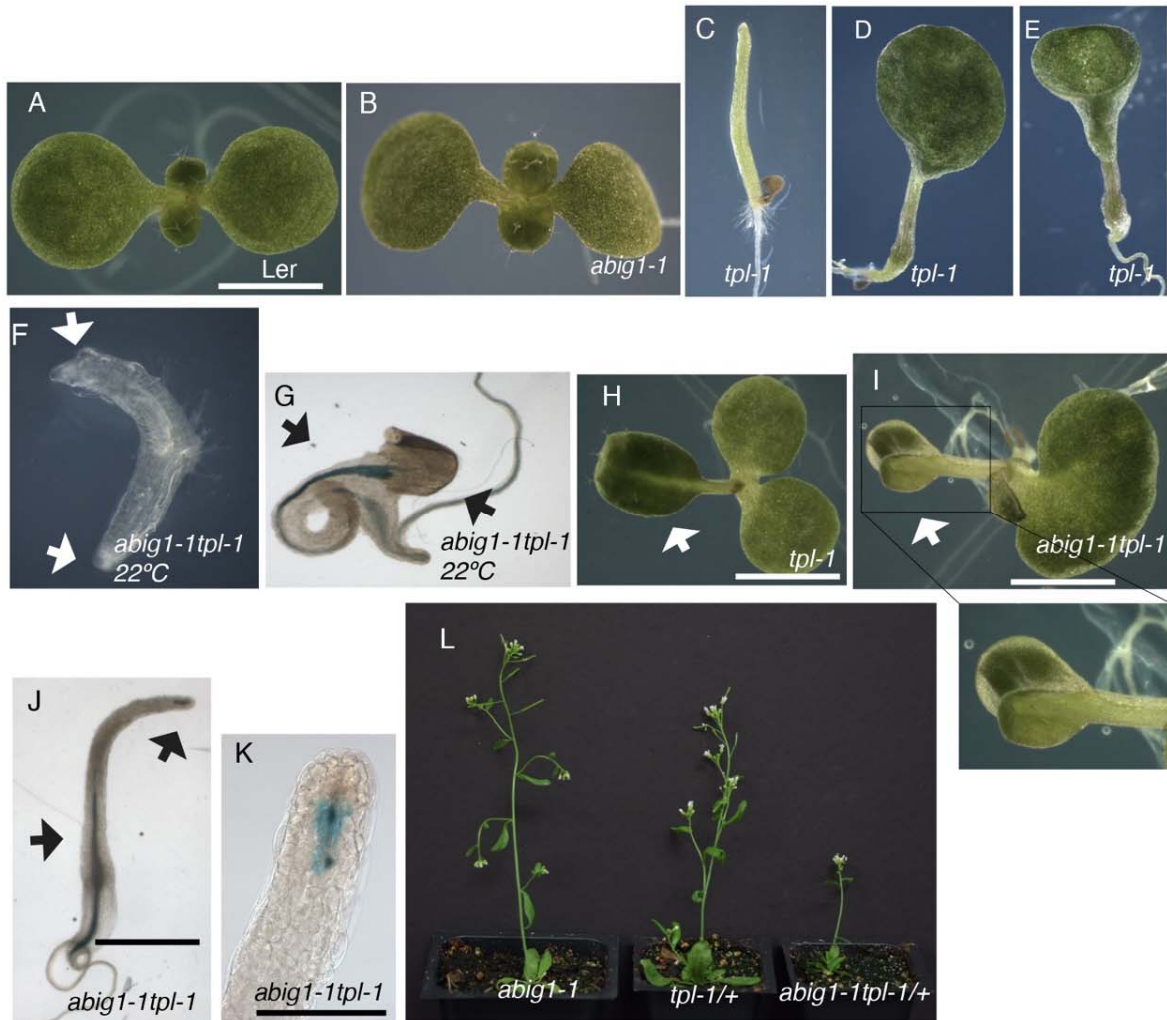



**Fig 6. ABIG1 interacts with TPL *in vitro* and *in vivo*.** (A) Yeast-two-hybrid assay to test the interaction between full-length or truncated versions of ABIG1 and TPL proteins. *B*-gal assays were used to indicate the interaction. Constructs 1-7 present the different truncated versions of the ABIG1 protein; 1, ABIG1N (amino acid, 1-52); 2, ABIG1NA (aa, 1-52; LXLXL changed to AXAXA); 3, ABIGNHD(aa, 1-202); 4, ABIGHD (53-202); 5, ABIG1HDC (53-287); 6, ABIG1C (203-287); 7, full-length ABIG1; and 8, REV as a negative control. (B) BiFC assays were used to test the ABIG1 interaction with TPL in *N. benthamiana* leaves. Yellow dots and red arrowheads indicate a positive signal. There was no signal detected from the negative control REV\*-MEK. Bars = 10  $\mu$ m.

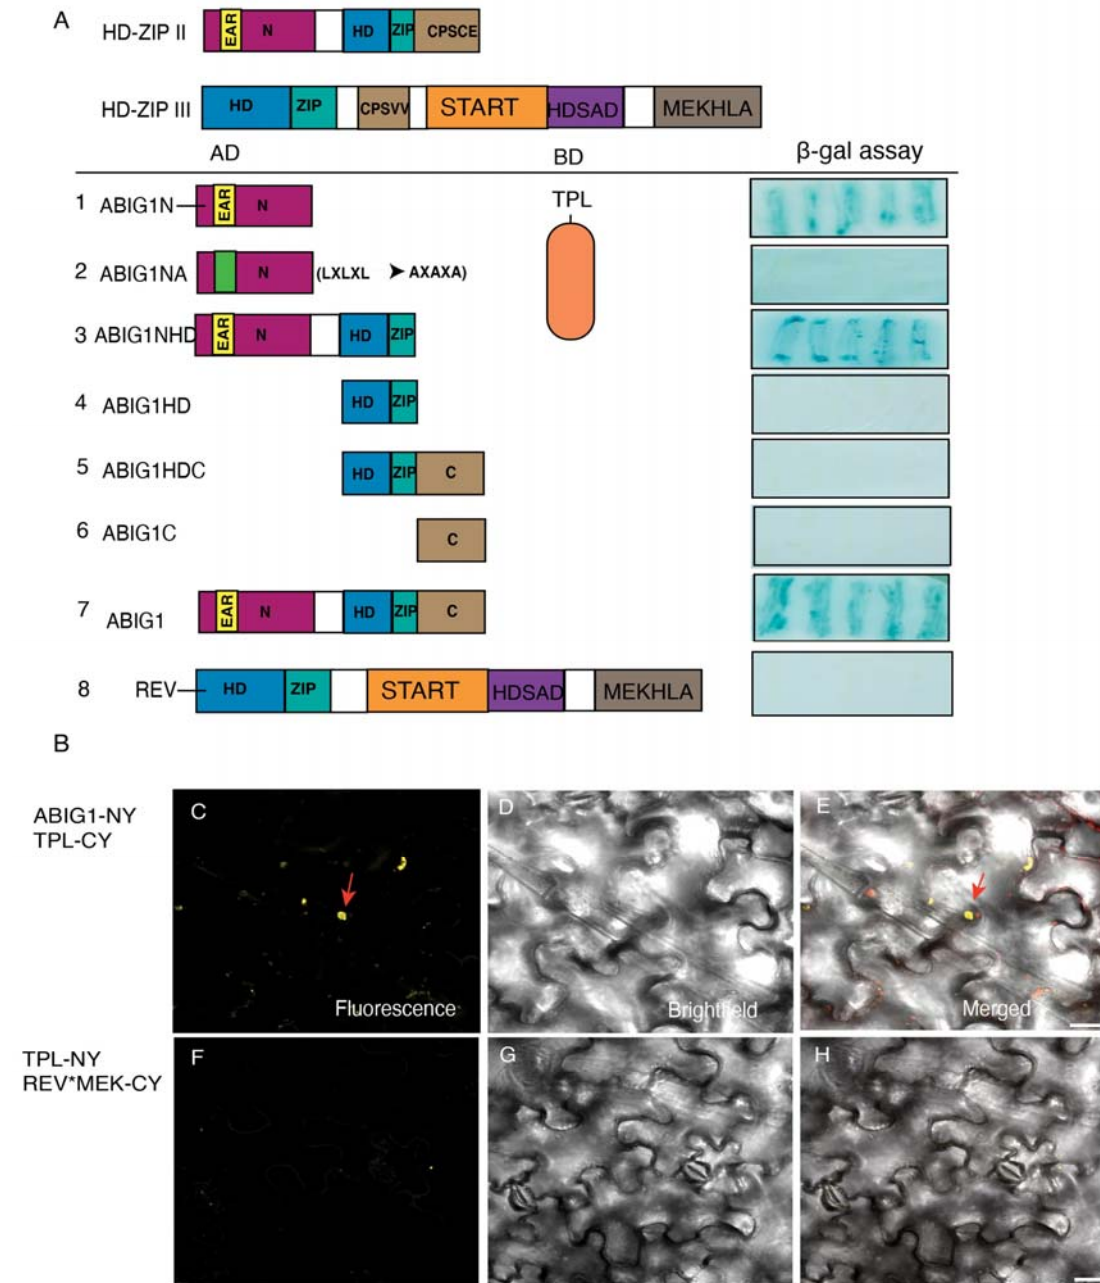

Source: https://www.biorxiv.org/content/10.1101/2021.06.16.448748v1.full.pdf
